# Supplementary material for: The efficacy of single mitochondrial genes at reconciling the complete mitogenome phylogeny—a case study on dwarf chameleons
Source: PeerJ. 2024 Apr 30;12:e17076. doi: 10.7717/peerj.17076 (PMC11067893; doi:10.7717/peerj.17076)
Supplement: Supplemental Information 1 — The efficacy of single mitochondrial genes at reconciling the complete mitogenome phylogeny –A case study on dwarf chameleons [file peerj-12-17076-s001.docx]

**Supplemental Information:**

The efficacy of single mitochondrial genes at reconciling the complete mitogenome phylogeny – A case study on dwarf chameleons

*Published in PeerJ {issue/pages to be added upon publication}*

Devon C. Main1, Jody M. Taft2,3, Anthony J. Geneva4, Bettine Jansen van Vuuren1, Krystal A. Tolley1,2*

1Centre for Ecological Genomics and Wildlife Conservation, University of Johannesburg, Auckland Park, 2006, Johannesburg, South Africa

2South African National Biodiversity Institute, Kirstenbosch Research Centre, Private Bag X7, Claremont 7735, South Africa

3School of Animal, Plant and Environmental Sciences, University of the Witwatersrand, P.O. Wits, 2050 Johannesburg, South Africa

4Department of Biology, Center for Computational and Integrative Biology, Rutgers University-Camden, Camden, NJ, USA

Table of contents

**Figure S1**: A best-supported coalescent phylogeny estimated in ASTRAL---------------------------------2

**Figure S2**: A best-supported maximum likelihood phylogeny showing site concordance factors-------3

**Table S1**: GenBank accession numbers for all sequences generated in this study------------------------ 4


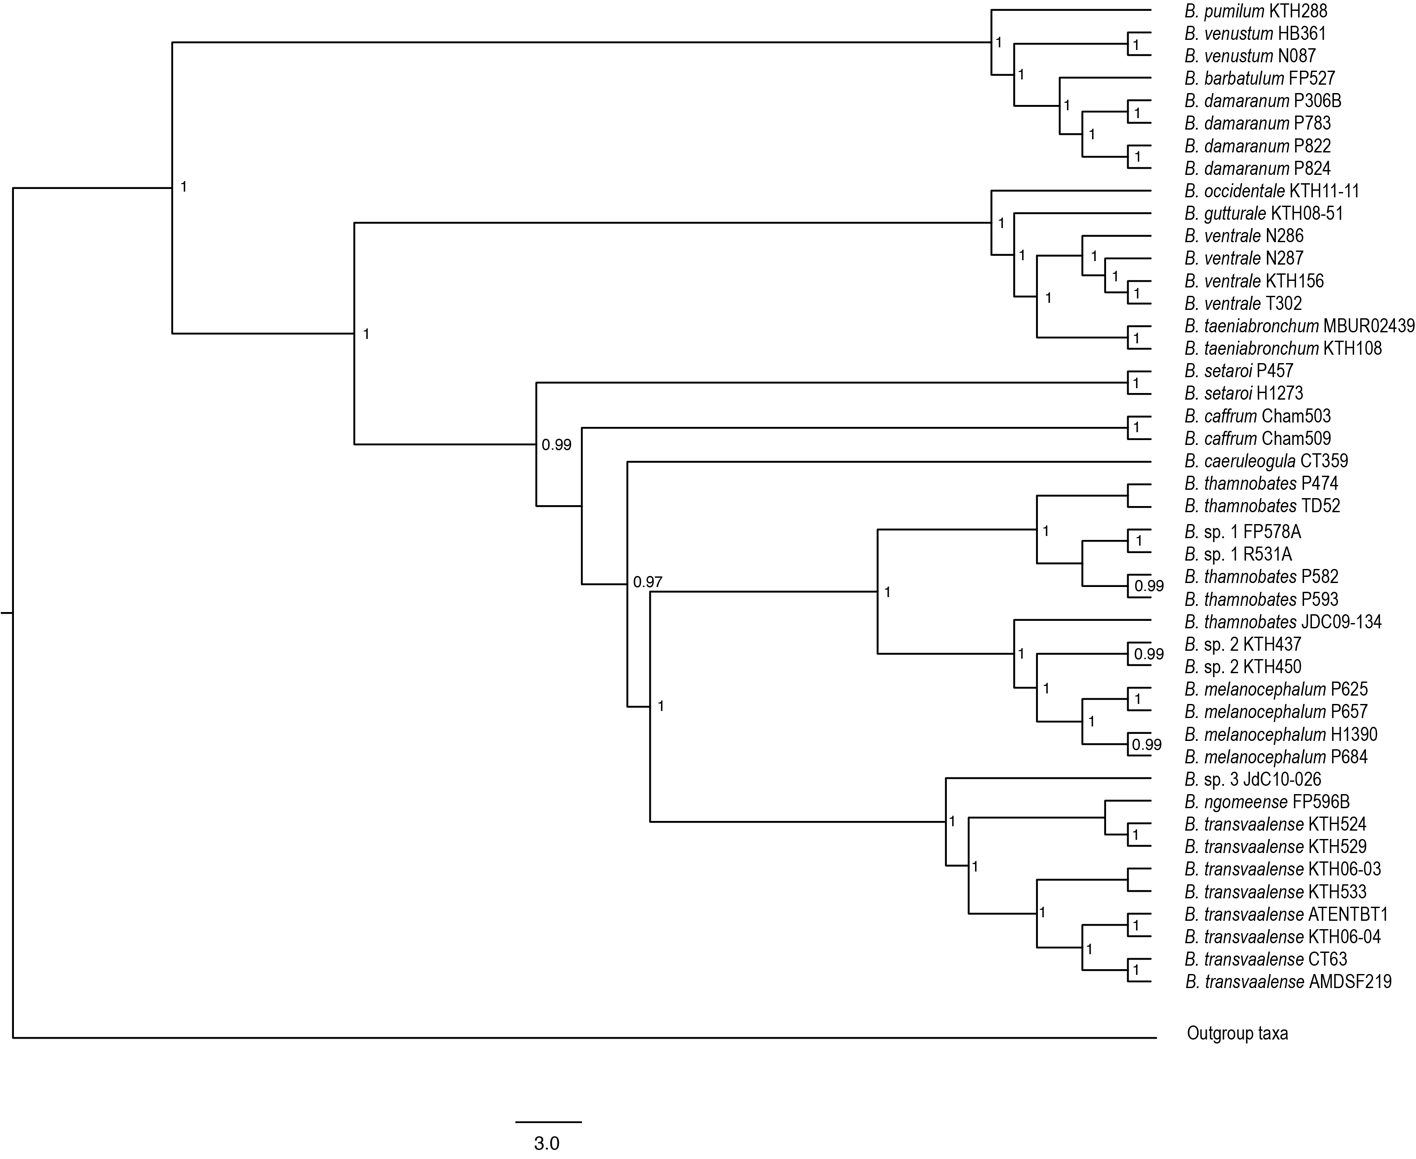


**Figure. S1:** A best-supported coalescent species tree inferred from 15 mitochondrial genes using ASTRAL. Local posterior probability support is indicated on nodes. Support values are only indicated for nodes with PP > 0.95.


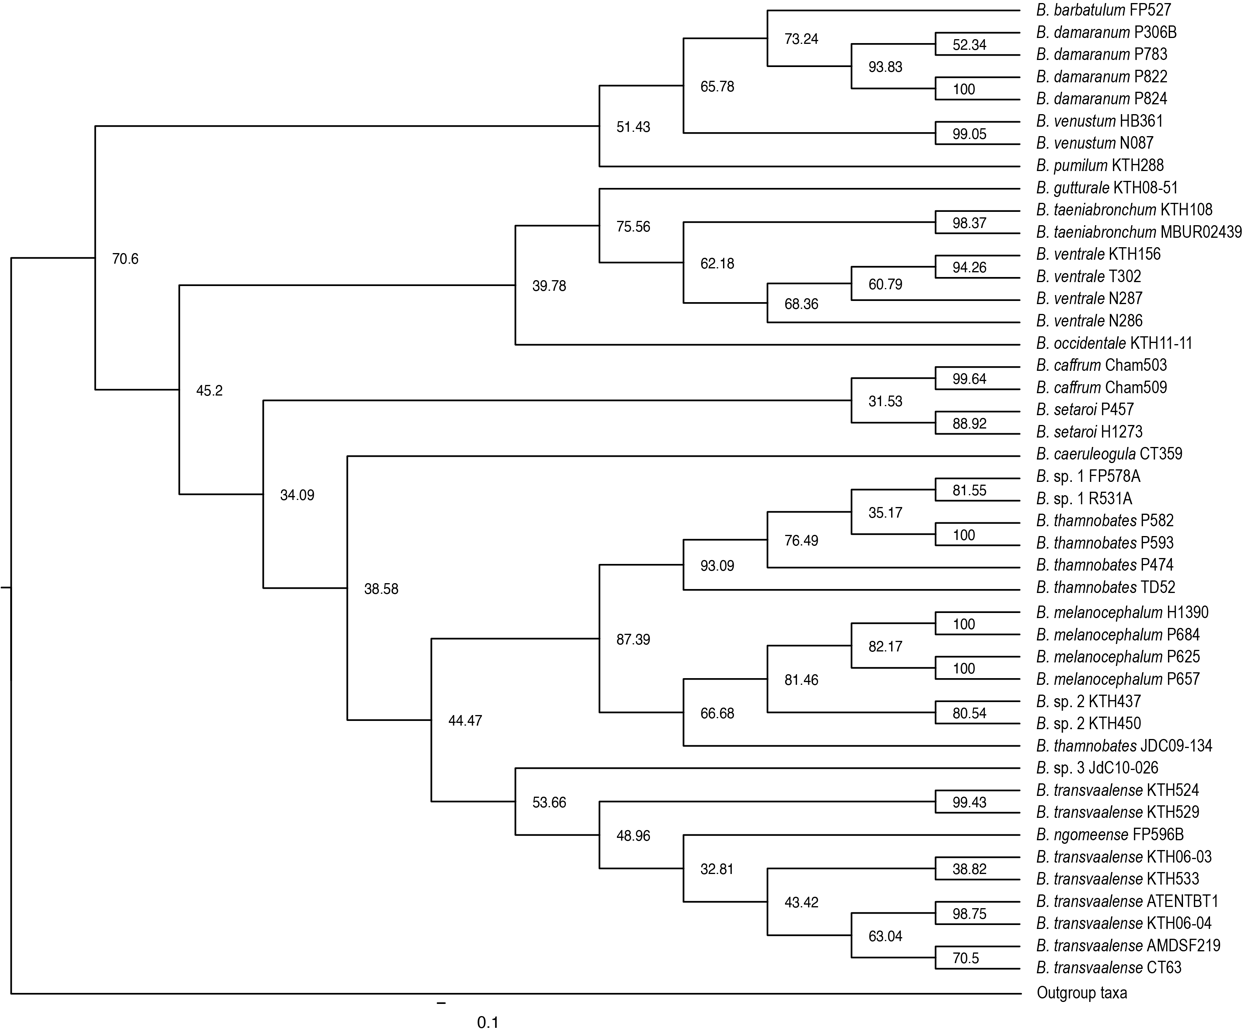


**Figure. S2:** A best-supported maximum likelihood tree inferred from 15 mitochondrial genes using IQ-TREE. Site concordance factors are indicated at the nodes.

**Table S1**: GenBank accession numbers for all Bradypodion sequences published in this study.

| **Species*** | **ID** | ***ATP6*** | ***ATP8*** | ***COI*** | ***COII*** | ***COIII*** | ***CytB*** | ***ND1*** | ***ND2*** | ***ND3*** | ***ND4*** | ***ND4l*** | ***ND5*** | ***ND6*** | ***12S*** | ***16S*** |
| --- | --- | --- | --- | --- | --- | --- | --- | --- | --- | --- | --- | --- | --- | --- | --- | --- |
| *B. barbatulum* | FP527 | OR701174 | OR701218 | OR707264 | OR701042 | OR701086 | OR701130 | OR700866 | OR700778 | OR700822 | OR700910 | OR700998 | OR701262 | OR700954 | OR767167 | OR766795 |
| *B. caeruleogula* | CT359 | OR701173 | OR701217 | OR707263 | OR701041 | OR701085 | OR701129 | OR700865 | OR700777 | OR700821 | OR700909 | OR700997 | OR701261 | OR700953 | OR767166 | OR766794 |
| *B. caffrum* | Cham503 | OR701170 | OR701214 | OR707260 | OR701038 | OR701082 | OR701126 | OR700862 | OR700774 | OR700818 | OR700906 | OR700994 | OR701258 | OR700950 | OR767163 | OR766791 |
| *B. caffrum* | Cham509 | OR701171 | OR701215 | OR707261 | OR701039 | OR701083 | OR701127 | OR700863 | OR700775 | OR700819 | OR700907 | OR700995 | OR701259 | OR700951 | OR767164 | OR766792 |
| *B.* sp. 3 | JdC10-026 | OR701179 | OR701223 | OR707269 | OR701047 | OR701091 | OR701135 | OR700871 | OR700783 | OR700827 | OR700915 | OR701003 | OR701267 | OR700959 | OR767172 | OR766800 |
| *B. damaranum* | P306B | OR701194 | OR701238 | OR707284 | OR701062 | OR701106 | OR701150 | OR700886 | OR700798 | OR700842 | OR700930 | OR701018 | OR701282 | OR700974 | OR767187 | OR766815 |
| *B. damaranum* | P783 | OR701202 | OR701246 | OR707292 | OR701070 | OR701114 | OR701158 | OR700894 | OR700806 | OR700850 | OR700938 | OR701026 | OR701290 | OR700982 | OR767195 | OR766823 |
| *B. damaranum* | P822 | OR701203 | OR701247 | OR707293 | OR701071 | OR701115 | OR701159 | OR700895 | OR700807 | OR700851 | OR700939 | OR701027 | OR701291 | OR700983 | OR767196 | OR766824 |
| *B. damaranum* | P824 | OR701204 | OR701248 | OR707294 | OR701072 | OR701116 | OR701160 | OR700896 | OR700808 | OR700852 | OR700940 | OR701028 | OR701292 | OR700984 | OR767197 | OR766825 |
| *B. gutturale* | KTH08-51 | OR701182 | OR701226 | OR707272 | OR701050 | OR701094 | OR701138 | OR700874 | OR700786 | OR700830 | OR700918 | OR701006 | OR701270 | OR700962 | OR767175 | OR766803 |
| *B. melanocephalum* | H1390 | OR701177 | OR701221 | OR707267 | OR701045 | OR701089 | OR701133 | OR700869 | OR700781 | OR700825 | OR700913 | OR701001 | OR701265 | OR700957 | OR767170 | OR766798 |
| *B. melanocephalum* | P625 | OR701199 | OR701243 | OR707289 | OR701067 | OR701111 | OR701155 | OR700891 | OR700803 | OR700847 | OR700935 | OR701023 | OR701287 | OR700979 | OR767192 | OR766820 |
| *B. melanocephalum* | P657 | OR701200 | OR701244 | OR707290 | OR701068 | OR701112 | OR701156 | OR700892 | OR700804 | OR700848 | OR700936 | OR701024 | OR701288 | OR700980 | OR767193 | OR766821 |
| *B. melanocephalum* | P684 | OR701201 | OR701245 | OR707291 | OR701069 | OR701113 | OR701157 | OR700893 | OR700805 | OR700849 | OR700937 | OR701025 | OR701289 | OR700981 | OR767194 | OR766822 |
| *B. ngomeense* | FP596B | OR701176 | OR701220 | OR707266 | OR701044 | OR701088 | OR701132 | OR700868 | OR700780 | OR700824 | OR700912 | OR701000 | OR701264 | OR700956 | OR767169 | OR766797 |
| *B. occidentale* | KTH11-11 | OR701183 | OR701227 | OR707273 | OR701051 | OR701095 | OR701139 | OR700875 | OR700787 | OR700831 | OR700919 | OR701007 | OR701271 | OR700963 | OR767176 | OR766804 |
| *B. pumilum* | KTH288 | OR701186 | OR701230 | OR707276 | OR701054 | OR701098 | OR701142 | OR700878 | OR700790 | OR700834 | OR700922 | OR701010 | OR701274 | OR700966 | OR767179 | OR766807 |
| *B. setaroi* | P457 | OR701206 | OR701250 | OR707296 | OR701074 | OR701118 | OR701162 | OR700898 | OR700810 | OR700854 | OR700942 | OR701030 | OR701294 | OR700986 | OR767199 | OR766827 |
| *B. setaroi* | H1273 | OR701195 | OR701239 | OR707285 | OR701063 | OR701107 | OR701151 | OR700887 | OR700799 | OR700843 | OR700931 | OR701019 | OR701283 | OR700975 | OR767188 | OR766816 |
| *B.* sp. 1 | FP578A | OR701175 | OR701219 | OR707265 | OR701043 | OR701087 | OR701131 | OR700867 | OR700779 | OR700823 | OR700911 | OR700999 | OR701263 | OR700955 | OR767168 | OR766796 |
| *B.* sp. 1 | R531A | OR701205 | OR701249 | OR707295 | OR701073 | OR701117 | OR701161 | OR700897 | OR700809 | OR700853 | OR700941 | OR701029 | OR701293 | OR700985 | OR767198 | OR766826 |
| *B.* sp. 2 | KTH-437 | OR701187 | OR701231 | OR707277 | OR701055 | OR701099 | OR701143 | OR700879 | OR700791 | OR700835 | OR700923 | OR701011 | OR701275 | OR700967 | OR767180 | OR766808 |
| *B.* sp. 2 | KTH-450 | OR701188 | OR701232 | OR707278 | OR701056 | OR701100 | OR701144 | OR700880 | OR700792 | OR700836 | OR700924 | OR701012 | OR701276 | OR700968 | OR767181 | OR766809 |
| *B. taeniabronchum* | KTH-108 | OR701184 | OR701228 | OR707274 | OR701052 | OR701096 | OR701140 | OR700876 | OR700788 | OR700832 | OR700920 | OR701008 | OR701272 | OR700964 | OR767177 | OR766805 |
| *B. taeniabronchum* | MBUR 02439 | OR701190 | OR701234 | OR707280 | OR701058 | OR701102 | OR701146 | OR700882 | OR700794 | OR700838 | OR700926 | OR701014 | OR701278 | OR700970 | OR767183 | OR766811 |
| *B. thamnobates* | P474 | OR701211 | OR701255 | OR707301 | OR701079 | OR701123 | OR701167 | OR700903 | OR700815 | OR700859 | OR700947 | OR701035 | OR701299 | OR700991 | OR767204 | OR766832 |
| *B. thamnobates* | P582 | OR701196 | OR701240 | OR707286 | OR701064 | OR701108 | OR701152 | OR700888 | OR700800 | OR700844 | OR700932 | OR701020 | OR701284 | OR700976 | OR767189 | OR766817 |
| *B. thamnobates* | P593 | OR701197 | OR701241 | OR707287 | OR701065 | OR701109 | OR701153 | OR700889 | OR700801 | OR700845 | OR700933 | OR701021 | OR701285 | OR700977 | OR767190 | OR766818 |
| *B. thamnobates* | TD52 | OR701198 | OR701242 | OR707288 | OR701066 | OR701110 | OR701154 | OR700890 | OR700802 | OR700846 | OR700934 | OR701022 | OR701286 | OR700978 | OR767191 | OR766819 |
| *B. thamnobates* | JDC09-134 | OR701210 | OR701254 | OR707300 | OR701078 | OR701122 | OR701166 | OR700902 | OR700814 | OR700858 | OR700946 | OR701034 | OR701298 | OR700990 | OR767203 | OR766831 |
| *B. transvaalense* | AMDSF219 | OR701168 | OR701212 | OR707258 | OR701036 | OR701080 | OR701124 | OR700860 | OR700772 | OR700816 | OR700904 | OR700992 | OR701256 | OR700948 | OR767161 | OR766789 |
| *B. transvaalense* | ATENTBT1 | OR701169 | OR701213 | OR707259 | OR701037 | OR701081 | OR701125 | OR700861 | OR700773 | OR700817 | OR700905 | OR700993 | OR701257 | OR700949 | OR767162 | OR766790 |
| *B. transvaalense* | CT-63 | OR701172 | OR701216 | OR707262 | OR701040 | OR701084 | OR701128 | OR700864 | OR700776 | OR700820 | OR700908 | OR700996 | OR701260 | OR700952 | OR767165 | OR766793 |
| *B. transvaalense* | KTH06-03 | OR701180 | OR701224 | OR707270 | OR701048 | OR701092 | OR701136 | OR700872 | OR700784 | OR700828 | OR700916 | OR701004 | OR701268 | OR700960 | OR767173 | OR766801 |
| *B. transvaalense* | KTH06-04 | OR701181 | OR701225 | OR707271 | OR701049 | OR701093 | OR701137 | OR700873 | OR700785 | OR700829 | OR700917 | OR701005 | OR701269 | OR700961 | OR767174 | OR766802 |
| *B. transvaalense* | KTH533 | OR701208 | OR701252 | OR707298 | OR701076 | OR701120 | OR701164 | OR700900 | OR700812 | OR700856 | OR700944 | OR701032 | OR701296 | OR700988 | OR767201 | OR766829 |
| *B. transvaalense* | KTH524 | OR701209 | OR701253 | OR707299 | OR701077 | OR701121 | OR701165 | OR700901 | OR700813 | OR700857 | OR700945 | OR701033 | OR701297 | OR700989 | OR767202 | OR766830 |
| *B. transvaalense* | KTH529 | OR701189 | OR701233 | OR707279 | OR701057 | OR701101 | OR701145 | OR700881 | OR700793 | OR700837 | OR700925 | OR701013 | OR701277 | OR700969 | OR767182 | OR766810 |
| *B. ventrale* | KTH156 | OR701185 | OR701229 | OR707275 | OR701053 | OR701097 | OR701141 | OR700877 | OR700789 | OR700833 | OR700921 | OR701009 | OR701273 | OR700965 | OR767178 | OR766806 |
| *B. ventrale* | N286 | OR701191 | OR701235 | OR707281 | OR701059 | OR701103 | OR701147 | OR700883 | OR700795 | OR700839 | OR700927 | OR701015 | OR701279 | OR700971 | OR767184 | OR766812 |
| *B. ventrale* | N287 | OR701192 | OR701236 | OR707282 | OR701060 | OR701104 | OR701148 | OR700884 | OR700796 | OR700840 | OR700928 | OR701016 | OR701280 | OR700972 | OR767185 | OR766813 |
| *B. ventrale* | T302 | OR701207 | OR701251 | OR707297 | OR701075 | OR701119 | OR701163 | OR700899 | OR700811 | OR700855 | OR700943 | OR701031 | OR701295 | OR700987 | OR767200 | OR766828 |
| *B. venustum* | HB361 | OR701178 | OR701222 | OR707268 | OR701046 | OR701090 | OR701134 | OR700870 | OR700782 | OR700826 | OR700914 | OR701002 | OR701266 | OR700958 | OR767171 | OR766799 |
| *B. venustum* | N087 | OR701193 | OR701237 | OR707283 | OR701061 | OR701105 | OR701149 | OR700885 | OR700797 | OR700841 | OR700929 | OR701017 | OR701281 | OR700973 | OR767186 | OR766814 |

*all species listed are in the genus *Bradypodion*. Sequences can be accessed at https://www.ncbi.nlm.nih.gov/genbank/.
